# Supplementary material for: Perspectives on Mobile Health Versus Clinic-Based Group Interventions for People With Serious Mental Illnesses: A Qualitative Study
Source: Atypon-hosted journal article supplement (doi:10.1176/appi.ps.201900110), 2019-10-16
Supplement: appi.ps.201900110.ds001.pdf [file appi.ps.201900110.ds001.pdf]

**Perspectives on Mobile Health Versus Clinic-Based Group Interventions for People With Serious Mental Illnesses:  
A Qualitative Study**

**Domains and Codes Used in Current Qualitative Analysis**

| <b>Domain: Indicators of Acceptability</b>   |                                                                                                        |
|----------------------------------------------|--------------------------------------------------------------------------------------------------------|
| <b>Code</b>                                  | <b>Definition</b>                                                                                      |
| Overall Impressions- positive                | Participant's description(s) of his/her overall impressions of FOCUS or WRAP; description is positive  |
| Liked                                        | Participant's description(s) of what s/he liked about FOCUS or WRAP                                    |
| Helpful                                      | Suggestions or skills that the participant found especially helpful                                    |
| Recommend- yes                               | Narrative description elaborating on participant's willingness to recommend the program to a friend    |
| <b>Domain: Indicators of Unacceptability</b> |                                                                                                        |
| <b>Code</b>                                  | <b>Definition</b>                                                                                      |
| Overall Impressions- negative                | Participant's description of his/her overall impressions of the FOCUS or WRAP; description is negative |
| Disliked                                     | Participant's description of what s/he disliked about FOCUS or WRAP                                    |
| Unhelpful                                    | Suggestions or skills that the participant found especially unhelpful                                  |
| Recommend-no                                 | Narrative description elaborating on participant's unwillingness to recommend the program to a friend  |

| <b>Domain: Challenges with the Intervention</b> |                                                                                                                  |
|-------------------------------------------------|------------------------------------------------------------------------------------------------------------------|
| <b>Code</b>                                     | <b>Definition</b>                                                                                                |
| Challenges- Intervention                        | Participant's description of challenging or problematic aspects of the FOCUS or WRAP intervention itself         |
| Challenges- Device                              | Participant's description of technical difficulties with the smart phone                                         |
| Challenges- Transportation                      | Participant's description of challenges associated with transportation to WRAP                                   |
| Challenges- Group interactions                  | Participant's description of challenges interacting with peers in WRAP groups                                    |
| <b>Domain: Impact of the Intervention</b>       |                                                                                                                  |
| <b>Code</b>                                     | <b>Definition</b>                                                                                                |
| Impact/change -overall                          | Participant's open-ended description of what is different for him/her after using FOCUS or participating in WRAP |
| Impact/change- sx experience                    | Participant's description of how the program impacted his/her experiences of symptoms                            |
| Impact/change- sx mgmt                          | Participant's description of how the program impacted how s/he manages symptoms                                  |
| Impact/change- everyday life                    | Participant's description of how the program impacted his/her everyday life                                      |
